# Supplementary material for: Pursuing Orally Bioavailable Hepcidin Analogues via Cyclic N-Methylated Mini-Hepcidins
Source: PubMed Central journal article supplement (PMC7915682; doi:10.3390/biomedicines9020164), 2021-02-08
Supplement: biomedicines-09-00164-s001.pdf [file biomedicines-09-00164-s001.pdf]

*Supplementary Information*

*Pursuing orally bioavailable hepcidin analogues via cyclic N-methylated mini-hepcidins*

Daniela Goncalves Monteiro<sup>1</sup>, Johannes W. A. van Dijk<sup>1</sup>, Randy Aliyanto<sup>1</sup>, Eileen Fung<sup>2</sup>, Elizabeta Nemeth<sup>2</sup>, Tomas Ganz<sup>2</sup>, K. Johan Rosengren<sup>1</sup>, Richard J. Clark<sup>1\*</sup>

<sup>1</sup>*School of Biomedical Sciences, Faculty of Medicine and Biomedical Sciences, University of Queensland, Chancellors Pl, Brisbane, QLD 4072, Australia*

<sup>2</sup>*David Geffen School of Medicine, University of California, Los Angeles, Los Angeles, California, USA.*

\*Corresponding author. Richard J. Clark

Tel.: +61 7 3365 1527

E-mail address: richard.clark@uq.edu.au

**Table S1.** Library of mini-hepcidin analogues that could not be tested.

| #  | Peptide                                                                                | Sequence <sup>1</sup>                                | Calc.<br>[M+H] <sup>+</sup> | Obs.<br>[M+H] <sup>+</sup>   | Yield <sup>2</sup>   |
|----|----------------------------------------------------------------------------------------|------------------------------------------------------|-----------------------------|------------------------------|----------------------|
| 1  | Hepcidin                                                                               | D T H F P I C I F C C G C C H R S K C G M<br>C C K T | 2789.42                     | [M+3H] <sup>+</sup><br>930.5 | 5%                   |
| 2  | Hep9                                                                                   | D T H F P I C I F                                    | 1092.27                     | 1092.5                       | 20%                  |
| 3  | Hep9[Ser <sup>1</sup> ]                                                                | S T H F P I C I F                                    | 1064.26                     | 1064.6                       | 5-10%                |
| 4  | Hep9[Melle <sup>6</sup> , Melle <sup>8</sup> ]                                         | D T H F P [N-Me I] C [N-Me I] F                      | 1120.32                     | 1120.4                       | 5%                   |
| 5  | Hep9[Ser <sup>1</sup> , MeThr <sup>2</sup> , Melle <sup>6</sup> ]                      | S [N-Me T] H F P [N-Me I] C I F                      | 1092.31                     | 1092.6                       | < 5%                 |
| 6  | Hep9[Ser <sup>1</sup> , MeThr <sup>2</sup> , Melle <sup>8</sup> ]                      | S [N-Me T] H F P I C [N-Me I] F                      | 1092.31                     | 1092.8                       | < 5%                 |
| 7  | Hep9[Ser <sup>1</sup> , MeThr <sup>2</sup> , Melle <sup>6</sup> , Melle <sup>8</sup> ] | S [N-Me T] H F P [N-Me I] C [N-Me I] F               | 1106.34                     | 1106.5                       | < 3%                 |
| 8  | cHep9                                                                                  | c(D T H F P I C I F)                                 | 1074.26                     | 1074.6                       | 10%                  |
| 9  | cHep9[Ser <sup>1</sup> ]                                                               | c(S T H F P I C I F)                                 | 1046.24                     | 1046.7                       | 5%                   |
| 10 | cHep9-Gly <sub>4</sub>                                                                 | c(D T H F P I C I F G G G G)                         | 1302.46                     | 1302.8                       | 5%                   |
| 11 | cHep9[MePhe <sup>4</sup> , MePhe <sup>9</sup> ]                                        | c(D T H [N-Me F] P I C I [N-Me F])                   | 1102.31                     | 1102.6                       | 5%                   |
| 12 | cHep9[Melle <sup>6</sup> , Melle <sup>8</sup> ]                                        | c(D T H F P [N-Me I] C [N-Me I] F)                   | 1102.31                     | 1102.6                       | < 5%                 |
| 13 | cHep9[Ser <sup>1</sup> , MeThr <sup>2</sup> , Melle <sup>8</sup> ]                     | c(S [N-Me T] H F P I C [N-Me I] F)                   | 1074.30                     | 1074.6                       | < 3%                 |
| 14 | Hep9[MeThr <sup>2</sup> , MeCys <sup>7</sup> ]                                         | D [N-Me T] H F P I [N-Me C] I F                      | 1120.32                     | 1120.8                       | Could not purify     |
| 15 | Hep9[MeThr <sup>2</sup> , Melle <sup>6</sup> , MeCys <sup>7</sup> ]                    | D [N-Me T] H F P [N-Me I] [N-Me C] I F               | 1134.35                     | -                            | Could not synthesise |
| 16 | Hep9[MeThr <sup>2</sup> , MeCys <sup>7</sup> , Melle <sup>8</sup> ]                    | D [N-Me T] H F P I [N-Me C] [N-Me I] F               | 1134.35                     | -                            | Could not purify     |
| 17 | Hep9[Ser <sup>1</sup> , MeThr <sup>2</sup> , MeCys <sup>7</sup> ]                      | S [N-Me T] H F P I [N-Me C] I F                      | 1092.31                     | -                            | Could not synthesise |
| 18 | cHep9[MeThr <sup>2</sup> , MeCys <sup>7</sup> ]                                        | D [N-Me T] H F P I [N-Me C] I F                      | 1102.31                     | 1102.7                       | Could not purify     |
| 19 | cHep9[MeThr <sup>2</sup> , Melle <sup>6</sup> , MeCys <sup>7</sup> ]                   | D [N-Me T] H F P [N-Me I] [N-Me C] I F               | 1116.34                     | -                            | Could not synthesise |

|           |                                                                                         |                                                                   |         |        |                      |
|-----------|-----------------------------------------------------------------------------------------|-------------------------------------------------------------------|---------|--------|----------------------|
| <b>20</b> | cHep9[MeThr <sup>2</sup> , MeCys <sup>7</sup> , Melle <sup>8</sup> ]                    | D [ <i>N</i> -Me T] H F P I [ <i>N</i> -Me C] [ <i>N</i> -Me I] F | 1116.34 | 1116.5 | Could not purify     |
| <b>21</b> | cHep9[Ser <sup>1</sup> , MeThr <sup>2</sup> , Melle <sup>6</sup> ]                      | S [ <i>N</i> -Me T] H F P [ <i>N</i> -Me I] C I F                 | 1074.30 | 1074.6 | Could not purify     |
| <b>22</b> | cHep9[Ser <sup>1</sup> , MeThr <sup>2</sup> , Melle <sup>6</sup> , Melle <sup>8</sup> ] | S [ <i>N</i> -Me T] H F P [ <i>N</i> -Me I] C [ <i>N</i> -Me I] F | 1088.33 | 1088.6 | Could not purify     |
| <b>23</b> | cHep9[Ser <sup>1</sup> , MeThr <sup>2</sup> , MeCys <sup>7</sup> ]                      | S [ <i>N</i> -Me T] H F P I [ <i>N</i> -Me C] I F                 | 1074.30 | -      | Could not synthesise |

<sup>1</sup>“c” corresponds to cyclic peptides and “*N*-Me” corresponds to *N*-methylated. <sup>2</sup>% Yield was calculated relative to crude product following HPLC purification.

**Table S2.** Liquid chromatography mass spectrometry (LC-MS) specifications for multiple reaction monitoring (MRM) protocols.

| #  | Compound                                                           | Obs.<br>[M+xH <sup>+</sup> ] | MRM<br>transitions      | Retention<br>time<br>(min) |
|----|--------------------------------------------------------------------|------------------------------|-------------------------|----------------------------|
| -  | Atenolol                                                           | 267.1                        | 225.1<br>190.1<br>145.2 | 1.19                       |
| -  | Methoxyverapamil                                                   | 485.4                        | 333.4<br>165.2<br>150.1 | 6.79                       |
| 2  | Hep 9                                                              | 1092.7                       | 501.1<br>354.2<br>336.0 | 6.54                       |
| 4  | Hep9[Melle <sup>6</sup> , Melle <sup>8</sup> ]                     | 1120.7                       | 372.4<br>245.2<br>217.5 | 6.48                       |
| 6  | Hep9[Ser <sup>1</sup> , MeThr <sup>2</sup> , Melle <sup>8</sup> ]  | 1092.0                       | 314.4<br>285.5<br>203.3 | 6.48                       |
| 8  | cHep9                                                              | 1074.7                       | 314.2<br>216.9<br>183.2 | 6.96                       |
| 12 | cHep9[Melle <sup>6</sup> , Melle <sup>8</sup> ]                    | 1102.9                       | 294.4<br>217.1<br>156.2 | 7.15                       |
| 13 | cHep9[Ser <sup>1</sup> , MeThr <sup>2</sup> , Melle <sup>8</sup> ] | 1074.5                       | 314.3<br>216.8<br>209.1 | 6.98                       |

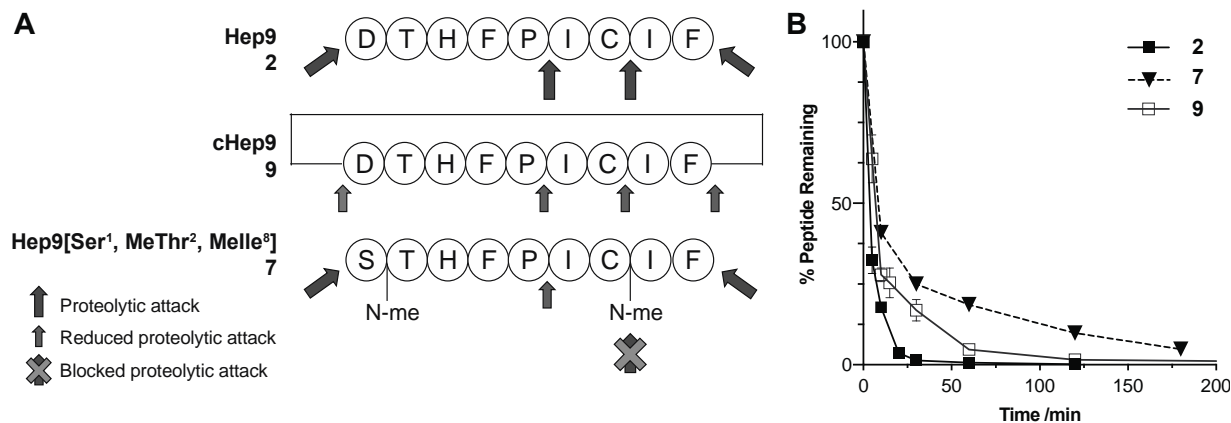

**Figure S1.** Effect of macrocyclisation and *N*-methylation on the stability of selected mini-hepcidin derivatives. **A)** Illustration of sites most susceptible to enzymatic attack in mini-hepcidin derivatives. **B)** Serum stability analysis of selected mini-hepcidins. Human male serum was centrifuged at 20,000 g for 10 minutes and the clear part of the supernatant was then diluted to 25% (v/v) with Milli-Q<sup>®</sup> water and incubated at 37°C for 15 minutes. Each peptide sample was dissolved in triplicate at a final concentration of 20 μM in pre-incubated 25% serum, or Milli-Q<sup>®</sup> water as a control. Aliquots of 100 μL were removed at different time points and quenched with 100 μL of 15% trichloroacetic acid (TCA), followed by incubation on ice for 30 min and centrifugation at 14,000 g for 5 minutes. Supernatant was then removed and transferred into vials for liquid chromatography mass spectrometry (LC-MS) analysis (50 μL injection and multiple reaction monitoring (MRM) protocol). Error bars indicate SEM, n=3. Comparison between Hep9, **2**, Hep9[Ser<sup>1</sup>, MeThr<sup>2</sup>, Melle<sup>8</sup>], **7**, and cHep9, **9**.
